# Supplementary material for: Hierarchical assembly of dual-responsive biomineralized polydopamine–calcium phosphate nanocomposites for enhancing chemo-photothermal therapy by autophagy inhibition
Source: Royal Society of Chemistry journal article supplement (doi:10.1039/d0bm00142b), 2020-01-01
Supplement: d0bm00142b1.pdf [file d0bm00142b1.pdf]

## Supplementary Information

| CaP/DTX | EE of DTX (%) | LC of DTX (%) | Size<br>(d. nm) | Zeta Potential<br>(mV) |
|---------|---------------|---------------|-----------------|------------------------|
| 10/1    | 82.42         | 3.06          | 198.6±1.13      | -29.85±0.35            |
| 15/1    | 85.60         | 1.46          | 196.2±1.00      | -30±0.57               |
| 30/1    | 88.07         | 0.76          | 192.6±1.10      | -28.13±0.20            |
| 60/1    | 89.76         | 0.34          | 188.5±0.45      | -29.2±0.25             |

Table S1. The influences of formulation parameters on DTX drug loading content (LC) and encapsulation efficiency (EE)

| PCNPs/D to CQ | EE of CQ (%) | LC of CQ (%) | Size<br>(d. nm) | Zeta Potential<br>(mV) |
|---------------|--------------|--------------|-----------------|------------------------|
| 20/1          | 16.67        | 0.79         | 194.1±0.12      | -30.0±0.30             |
| 15/1          | 18.58        | 1.16         | 186.2±1.20      | -29.3±0.02             |
| 10/1          | 19.87        | 4.76         | 177.2±0.32      | -28.9±0.05             |
| 5/1           | 21.15        | 2.43         | 172.7±1.25      | -29.9±0.68             |

Table S2. The influences of formulation parameters on the LC and EE of CQ.

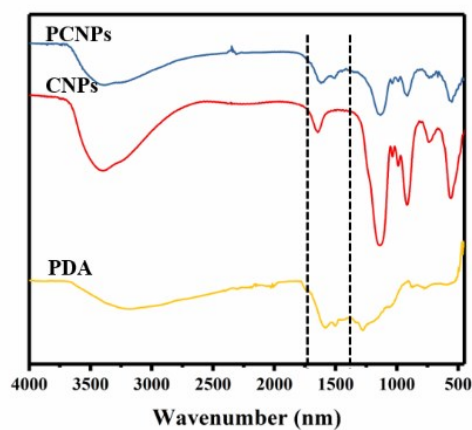

Fig. S1 FT-IR analysis of PDA, CNPs and PCNPs.

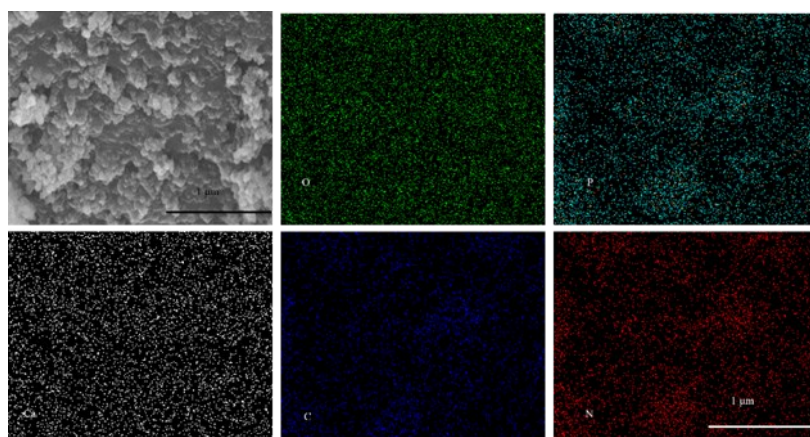

Fig. S2 Corresponding elemental (O, P, Ca, C and N) mappings of PCNPs. Scale bar=1  $\mu\text{m}$

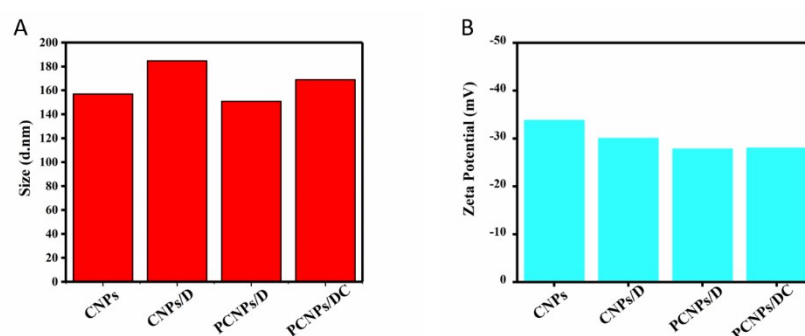

Fig. S3 (A) The sizes and (B) zeta potentials of CNPs, CNPs/D, PCNPs/D, PCNPs/DC.

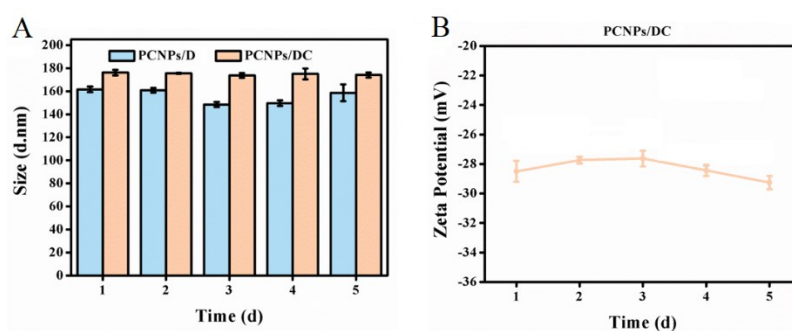

Fig. S4 (A) The sizes and (B) zeta potentials of PCNPs and PCNPs/DC for 5 days.

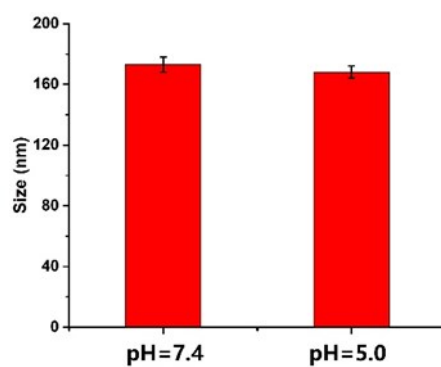

Fig. S5 Size changes of PCNPs/DC at pH 7.4 and pH 5.0.

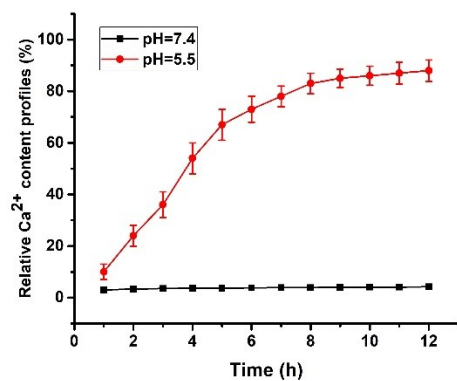

Fig. S6 The  $\text{Ca}^{2+}$  content profiles for the PCNPs/DC in different conditions measured at pH 7.4 and 5.0 in PBS at room temperature.

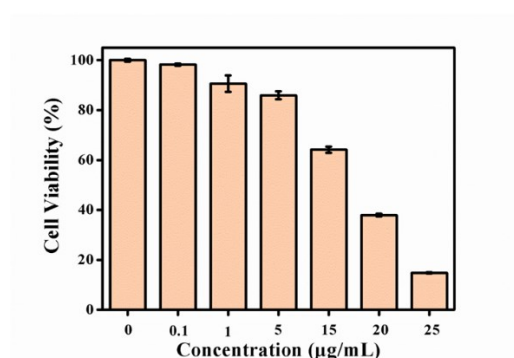

Fig. S7 Relative viability of MDA-MB-231 cancer cells incubated with PCNPs/C at different concentrations of CQ for 24 h.

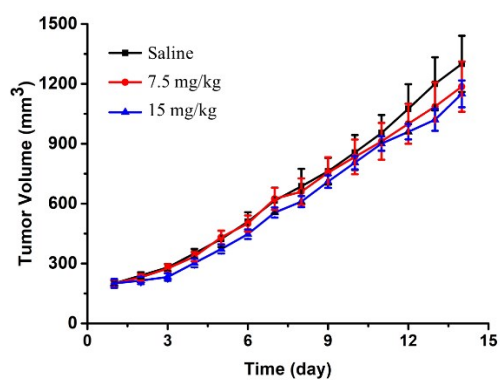

Fig. S8 Tumor growth curves of mice after saline and 7.5 mg/kg and 15 mg/kg of CQ treatments in 15 days.
